# Supplementary material for: Genomic and expression analysis of the flax (Linum usitatissimum) family of glycosyl hydrolase 35 genes
Source: PubMed Central journal article supplement (PMC3673811; doi:10.1186/1471-2164-14-344), 2013-05-23
Supplement: 1471-2164-14-344-S3.pdf [file 1471-2164-14-344-S3.pdf]

|          | 10       | 20             | 30        | 40                |
|----------|----------|----------------|-----------|-------------------|
| AtBGAL01 | RLFESQGG | PIILSQ         | -----     | IENEYGPM EYE      |
| AtBGAL02 | KLFETQGG | PIILSQ         | -----     | IENEYGP M QWE     |
| AtBGAL03 | NLFESQGG | PIILSQ         | -----     | IENEYGR QGQL      |
| AtBGAL04 | KLFQTQGG | PIILAQ         | -----     | IENEYGP V EWE     |
| AtBGAL05 | RFFASQGG | PIILSQ         | -----     | IENEFEP D LKG     |
| AtBGAL06 | GLYASQGG | PIILSQ         | -----     | IENEYAN V EGA     |
| AtBGAL07 | KLFASQGG | PIILAQ         | -----     | IENEYGN V I SS    |
| AtBGAL08 | KLYASQGG | PIILSQ         | -----     | IENEYGN I DSA     |
| AtBGAL09 | KLFCWQGG | PIIMLQ         | -----     | IENEYGD V EKS     |
| AtBGAL10 | KLFAPQGG | PIILSQ         | -----     | VENEYGY Y EKD     |
| AtBGAL11 | RLFASQGG | PIILGQ         | -----     | IENEYSAV QRA      |
| AtBGAL12 | KLFETQGG | PIILSQ         | -----     | IENEYGP I EWE     |
| AtBGAL13 | KLFASQGG | PIILGQ         | -----     | IENEYSAV QRA      |
| AtBGAL14 | KLFASQGG | PIILGQ         | -----     | IENEYNAV QLA      |
| AtBGAL15 | KLFASQGG | PIILAQ         | -----     | IENEYGN V I GS    |
| AtBGAL16 | NLYASQGG | PIILSQ         | -----     | IENEYGM V GRA     |
| AtBGAL17 | PLLYSNGG | PVIMVQ         | -----     | IENEYGS Y GND     |
| AtBGAL18 | -----    | -----          | -----     | -----             |
| LuBGAL01 | QLFEPQGG | PIILSQ         | -----     | IENEYGP I EWE     |
| LuBGAL02 | ELFEPQGG | PIILSQ         | -----     | IENEYGP I EWE     |
| LuBGAL03 | KLFEPQGG | PIILSQ         | -----     | IENEYGP V EYE     |
| LuBGAL04 | KLFEPQGG | PIILSQ         | -----     | IENEYGP V EYE     |
| LuBGAL05 | RLFETQGG | PIILSQ         | -----     | IENEYGP M EYE     |
| LuBGAL06 | RLFENQGG | PIILSQ         | -----     | IENEYGP M ENE     |
| LuBGAL07 | RLFENQGG | PIILSQ         | -----     | IENEYGP M EYE     |
| LuBGAL08 | KLFASQGG | PIILSQ         | -----     | IENEYGP E SKA     |
| LuBGAL09 | KLFASQGG | PIILSQ         | -----     | IENEYGP E SKA     |
| LuBGAL10 | NLFASQGG | PIILAQ         | -----     | VENEYGN V EWA     |
| LuBGAL11 | QLFASQGG | PIILAQ         | -----     | VENEYGN V QAS     |
| LuBGAL12 | SLFESQGG | PIILSQ         | -----     | IENEYGA Q SKM     |
| LuBGAL13 | SLFESQGG | PIILSQ         | -----     | IENEYGA Q SKM     |
| LuBGAL14 | SLFESQGG | PIILSK         | -----     | IENEYGA Q SKM     |
| LuBGAL15 | NLFESQGG | PIILSQ         | -----     | IENEYGV Q SKL     |
| LuBGAL16 | NLFESQGG | PIILSQ         | -----     | IENEYGV Q SKL     |
| LuBGAL17 | KLYASQGG | PIILSQ         | -----     | IENEYGN V DAA     |
| LuBGAL18 | KLYASQGG | PIILSQ         | -----     | IENEYGN V DAA     |
| LuBGAL19 | QLFSWQGG | PIIMLQ         | -----     | IENEYGN I ESS     |
| LuBGAL20 | KLFASQGG | -----          | DWAA----- | ASSLQVENEYGYEQF   |
| LuBGAL21 | KLFASQGG | ASSSSLDWD      | -----     | ASSLQVENEYGYEQF   |
| LuBGAL22 | KLFASQGG | PIILAQASKT     | -----     | ITQETVENEYGFYEQF  |
| LuBGAL23 | AAEWNYGG | IPVWLHYIPGTVFR | TDNTNFKV  | VENEYQYEQF        |
| LuBGAL24 | KLFASQGG | PIILAQASKT     | -----     | I IQEKVENEYWLYEQY |
| LuBGAL25 | ASQGDNG  | PIILAQAS       | -----     | TRQS-FSVENEYQYEQF |
| LuBGAL26 | NLFASQGG | PIIMSQ         | -----     | INTCNGRHCAN       |
| LuBGAL27 | KLFASQGG | PIIMSQ         | -----     | IENEYAN V ERA     |
| LuBGAL28 | RLFASQGG | PIIMSQ         | -----     | VENEYGN V EGV     |
| LuBGAL29 | KLFAGQGG | PIILAQ         | -----     | IENEYNTVQLA       |
| LuBGAL30 | KLFAGQGG | PIILAQ         | -----     | IENEYNTVQLA       |
| LuBGAL31 | NLFAEQGG | PIILAQ         | -----     | IENEYNTVQLA       |
| LuBGAL32 | NLFAEQGG | PIILAQ         | -----     | IENEYNTVQLA       |
| LuBGAL33 | NLFASQGG | PIILSQ         | -----     | IENEYTN V ESA     |
| LuBGAL34 | GLFASQGG | PIILAQ         | -----     | IENEYQN I EAA     |
| LuBGAL35 | -----    | -----          | -----     | -----             |
| LuBGAL36 | GLFASDGG | PIILAQ         | -----     | IENVYQN V EAA     |
| LuBGAL37 | GLFASQGG | PIILAQ         | -----     | IENEYQN V EAA     |
| LuBGAL38 | NLYASQGG | PIILSQ         | -----     | VENEYQT I ESA     |
| LuBGAL39 | NLYASQGG | PIILSQ         | -----     | VENEYQT I ESA     |
| LuBGAL40 | NLYASQGG | PIILTO         | -----     | IENEYGT Y EGA     |
| LuBGAL41 | TLLYNNGG | PVIMVQ         | -----     | IENEFGS Y GDD     |
| LuBGAL42 | PLLYNNGG | PVIMVQ         | -----     | IENEFGS Y GDD     |
| LuBGAL43 | -----    | -----          | -----     | -----             |
| OsBGAL01 | NLFASQGG | PIILSQ         | -----     | IENEYGP E GKE     |
| OsBGAL02 | GLFEWQGG | PIILAQ         | -----     | VENEYGP M ESV     |
| OsBGAL03 | GLFEWQGG | PIILSQ         | -----     | IENEFGP L EWD     |
| OsBGAL04 | QFFASQGG | PIILAQ         | -----     | VENEYGD M EQA     |
| OsBGAL05 | KMFASQGG | PIILAQ         | -----     | IENEYGN I MGK     |
| OsBGAL06 | GLYYPQGG | PIIISQ         | -----     | IENEYQM I EPA     |
| OsBGAL07 | GLFEWQGG | PIIMSQ         | -----     | VENEFGP M ESV     |
| OsBGAL08 | GLYASQGG | PIILSQ         | -----     | IENEYGN I DSA     |
| OsBGAL09 | PLLYSNGG | PVIMVQ         | -----     | IENEFGS F GDD     |
| OsBGAL10 | KLFASQGG | PIILAQ         | -----     | IENEYQH L EVA     |
| OsBGAL11 | EMFAPQGG | PIILSQ         | -----     | IENEYGN I KKD     |
| OsBGAL12 | NMFAGQGG | PIILAQ         | -----     | IENEYGN V MGQ     |
| OsBGAL13 | KLYSWQGG | PIILGQ         | -----     | IENEYGN I QGN     |
| OsBGAL14 | NMFAGQGG | PIILAQ         | -----     | IENEYGT M LQ      |
| OsBGAL15 | NMFAGQGG | PIILAQ         | -----     | IENEYGN I MGQ     |
| OsBGAL16 | -----    | -----          | -----     | -----             |
